1  
2  
3  
4  
5  
6  
7  
8  
9  
10  
11  
12  
13  
14  
15  
16  
17  
18  
19  
20  
21  
22  
23  
24  
25  
26  
27

## **Demographic inference provides insights into the extirpation and ecological dominance of eusocial snapping shrimps**

Solomon T. C. Chak<sup>a,b,c,1</sup>, Stephen E. Harris<sup>a,d,1</sup>, Kristin M. Hultgren<sup>e</sup>, J. Emmett Duffy<sup>f</sup> and Dustin R. Rubenstein<sup>a</sup>

<sup>a</sup> Department of Ecology, Evolution and Environmental Biology, Columbia University, New York, NY 10027, USA

<sup>b</sup> Department of Biological Sciences, New Jersey Institute of Technology, Newark, NJ 07102, USA

<sup>c</sup> Department of Biological Sciences, SUNY College at Old Westbury, Old Westbury, NY 11568, USA

<sup>d</sup> Biology Department, SUNY Purchase College, Purchase, NY 10577, USA

<sup>e</sup> Biology Department, Seattle University, Seattle, WA 98122, USA

<sup>f</sup> Tennenbaum Marine Observatories Network, Smithsonian Institution, 647 Contees Wharf Road, Edgewater, MD 21037, USA

Corresponding author: Solomon T. C. Chak, Department of Biological Sciences, SUNY College at Old Westbury, Old Westbury, NY 11568, USA, [chakt@oldwestbury.edu](mailto:chakt@oldwestbury.edu), 804-223-2128

<sup>1</sup> Both authors contributed equally to this manuscript

28 **Abstract**

29

30 Eusocial animals often achieve ecological dominance in the ecosystems where they occur, a  
31 process that may be linked to their demography. That is, reproductive division of labor and high  
32 reproductive skew in eusocial species is predicted to result in more stable effective population  
33 sizes that may make groups more competitive, but also lower effective population sizes that may  
34 make groups more susceptible to inbreeding and extinction. We examined the relationship  
35 between demography and social organization in one of the few animal lineages where eusociality  
36 has evolved recently and repeatedly among close relatives, the *Synalpheus* snapping shrimps.  
37 Although eusocial species often dominate the reefs where they occur by outcompeting their non-  
38 eusocial relatives for access to sponge hosts, many eusocial species have recently become  
39 extirpated across the Caribbean. Coalescent-based historical demographic inference in 12 species  
40 found that across nearly 100,000 generations, eusocial species tended to have lower but more  
41 stable effective population sizes through time. Our results are consistent with the idea that stable  
42 population sizes may enable eusocial shrimps to be more competitively dominant, but they also  
43 suggest that recent population declines are likely caused by eusocial shrimps' heightened  
44 sensitivity to anthropogenically-driven environmental changes as a result of their low effective  
45 population sizes and localized dispersal, rather than to natural cycles of inbreeding and  
46 extinction. Thus, although the unique life histories and demography of eusocial shrimps has  
47 likely contributed to their persistence and ecological dominance over evolutionary timescales,  
48 these social traits may also make them vulnerable to contemporary environmental change.

49

50 **Keywords** – ddRAD; historical demography; effective population size; eusociality; MOMI2;  
51 *Synalpheus*

52

53

54

55

56

57

58

59

60

61

62

63

64

65

66 Eusocial species are often the most abundant members of their community (1, 2). Their ability to  
67 outcompete conspecifics, expand their niches, and assert their ecological dominance over non-  
68 eusocial species—an idea referred to as the ‘social conquest hypothesis’—may be due in part to  
69 their ability to cooperate and form complex societies (2, 3). Wilson (4) proposed several  
70 population-level qualities of life history and demography that contribute to the ecological success  
71 of eusocial ants and their persistence over evolutionary time. Since all of the more than 13,000  
72 species of ants are eusocial (5), testing these ideas empirically has been challenging. Moreover,  
73 whether these demographic characteristics are shared in other eusocial organisms that exhibit  
74 various forms of social complexity and ecological success remains unclear. Although a few  
75 studies have examined empirically and comparatively whether social populations and eusocial  
76 species have been able to expand their ecological niches (3, 6, 7) and geographic ranges (8)  
77 relative to non-social ones, the specific life history and demographic characteristics that allow  
78 eusocial species to maintain high population densities that can be sustained for long periods of  
79 time remain largely unexplored.

80  
81 Social conquest and ecological dominance may be facilitated or hindered by several life history  
82 characteristics specific to eusocial species that are known to influence demography and genetic  
83 diversity. First, in eusocial species, reproductive division of labor and high reproductive skew  
84 may lead to a reduction in effective population size ( $N_e$ ) (9, 10) because the breeding population  
85 (reflected by  $N_e$ ) is constrained to mainly a single or few reproductive individuals (i.e. queens).  
86 In contrast, a much larger portion of the population contributes to breeding in non-eusocial  
87 species. Second, reproductives in eusocial species may be buffered from environmental  
88 fluctuation by the workers that cooperatively attend them, resulting in more stable  $N_e$  over time  
89 (11, 12). Similarly, the ability to cooperatively defend and maintain a stable domicile (4) may  
90 further buffer the breeding individuals—and indeed the entire group—from environmental  
91 fluctuation, similarly resulting in more stable  $N_e$  over time. Together, the demographic  
92 consequences of these life history characteristics are likely to be lower  $N_e$ , but greater population  
93 stability over time in eusocial species than non-eusocial species (4). Yet, at the same time, these  
94 or other demographic correlates of eusociality can also render some eusocial lineages unstable,  
95 resulting in inbreeding, local extinction, and even evolutionary dead-ends. For example, lineages  
96 containing social spider species have undergone repeated origins and extinctions, likely due to  
97 inbreeding, reduced  $N_e$ , and the depletion of genome-wide genetic diversity (13-15). Indeed,  
98 instances of inbreeding that generate low genetic diversity and the potential for colony collapse  
99 (16)—often in the face of environmental fluctuation—are surprisingly common in other  
100 primitively eusocial species like wood-dwelling termites, thrips, spider mites, and naked mole-  
101 rats (reviewed in 15). Ultimately, conflicting empirical evidence from insects lead to contrasting  
102 predictions about the role of historical demography in social evolution: reproductive division of  
103 labor and protection of female reproductives by workers predicts a historical trend of population  
104 stability in eusocial species, whereas low  $N_e$ , the potential for inbreeding, and reduced genome-  
105 wide genetic diversity predicts long-term population instability for eusocial species.

106  
107 Testing these contrasting predictions and bridging the gap between these alternative scenarios of  
108 the demographic stability of eusociality can be done using coalescent-based methods that infer  
109 historical demography. Historical expansions or contractions in population size, as well as  
110 population structure and gene flow, leave a measurable signal on the genetic diversity of  
111 contemporary populations, which allows for the quantification of the demographic process based

112 on the site frequency spectrum (SFS), a measure of allele frequencies across the genome that can  
113 be generated from large-scale sequencing. The effects of demographic processes on the SFS are  
114 well studied and have been tested across a range of taxa (17-19). Demographic inference is  
115 commonly made using a composite likelihood framework that fits the observed SFS to the  
116 expected SFS computed under given demographic histories (17, 20-24). This approach has been  
117 used successfully in species ranging from mice (25) to humans (26). Recent studies have also  
118 begun modelling comparative demographic processes across multiple taxa simultaneously (20,  
119 27-30), including eusocial bees (31) and social spiders (14). These and other studies examine  
120 relative patterns of  $N_e$  change through time, rather than simply comparing absolute estimates at  
121 specific time points (32-41), an approach that would enable us to test alternative demographic  
122 scenarios in eusocial lineages. Moreover, the broad use of coalescent-based methods has shown  
123 its robustness as a population genetic tool and can accurately select models and estimate  
124 parameters using as few as 3-15 individuals and 10,000 – 50,000 single nucleotide  
125 polymorphism (SNP) loci (42, 43). Therefore, it is now feasible to use a multi-taxa comparative  
126 demographic framework to test long-standing hypotheses underlying how population dynamics  
127 influence the ecological consequences of eusociality.

128  
129 Here, we use a group of socially diverse, sponge-dwelling snapping shrimps in the genus  
130 *Synalpheus* to look at the demographic consequences of eusociality and to address whether  
131 historical  $N_e$  supports a model of demographic stability or instability in eusocial species.  
132 *Synalpheus* shrimps in the West Atlantic *gambarelloides* group represent a relatively young  
133 lineage that radiated between approximately 5 and 7 Mya (44), yet eusociality has evolved  
134 independently at least four times in this group (45) and likely represents an early stage of  
135 eusocial evolution because workers are not sterile (46, 47). Species in this clade exhibit a variety  
136 of forms of social organization, ranging from pair-living, to communal breeding (multiple mating  
137 pairs in the same sponge), to eusociality (one or a few queens and a larger number of non-sterile  
138 workers of both sexes) (45-48). Most importantly, there are reports of both ecological dominance  
139 and demographic instability in eusocial *Synalpheus* species. The diversity of *Synalpheus* species  
140 in Carrie Bow Cay, Belize has been well documented since 1990 and represents the only  
141 longitudinal dataset on snapping shrimps currently available. At this reef, the four eusocial  
142 shrimp species contributed to >65% of the quantitative samples and eusocial species were 17  
143 times as abundant as non-eusocial species (49). Eusocial species also occupied more sponges and  
144 had a wider host breadth than their non-eusocial relatives (7). Thus, for more than two decades,  
145 eusocial *Synalpheus* outcompeted their non-eusocial relatives and remained the ecologically  
146 dominant shrimp species on the reef. However, since 2012, three of the four eusocial species at  
147 Carrie Bow Cay have become locally extinct. In addition, two eusocial species in Jamaica have  
148 shown population declines associated with an increase of queenless colonies (50), and a eusocial  
149 species in Panama has also declined (45). In these same reefs in Jamaica and Panama, pair-living  
150 and communal breeding *Synalpheus* species appear to at least be maintaining healthy  
151 populations, if not increasing in abundance. Therefore, despite evidence of sustained ecological  
152 dominance, eusocial *Synalpheus* shrimps have seen recent population declines over much of their  
153 range. These recent population declines could be a snapshot of cyclic population bottlenecks that  
154 reflect the long-term demographic instability of eusocial species. However, since the colony  
155 organization of eusocial species (i.e., reproductive division of labor and high reproductive skew)  
156 (4, 9) also predicts that they could have low but stable population sizes, if eusocial species show  
157 a historical trend of population stability, then these recent population declines are more likely to

158 be explained by contemporary environmental change (e.g. increased anthropogenic  
159 environmental disturbance).

160  
161 To explore the relationship between demography and eusociality, we generated genome-wide  
162 SNP data using double digest restriction-site associated DNA sequencing (ddRADseq) and  
163 performed demographic inference to compare long-term demographic patterns in four eusocial  
164 and eight non-eusocial shrimp species (including five communal breeding and three pair-forming  
165 species). We inferred historical  $N_e$  by finding which pattern of population size changes over time  
166 generated an expected SFS that best matches our observed SFS. Using inferred historical  $N_e$ , we  
167 then calculated average  $N_e$  over multiple timepoints, assuming the same mutation and  
168 recombination rates across species (51), and three population stability metrics: (i) the coefficient  
169 of variation of  $N_e$  across times (CV) to quantify the variation of  $N_e$  that is independent of mean  
170  $N_e$ , where a smaller value indicates greater population stability; (ii) the ratio of minimum  $N_e$  to  
171 mean  $N_e$  (min/mean  $N_e$ ), where a larger value indicates a less severe population bottleneck, and  
172 thus greater population stability; and (iii) the number of times that two consecutive  $N_e$  estimates  
173 had less than one order of magnitude difference (no. of <1-order change), where a larger value  
174 indicates less drastic changes in  $N_e$ , and thus greater population stability. Ultimately, linking  
175 demography to social evolution through population genetic approaches (52) not only has the  
176 potential to uncover the demographic factors that may have enabled some eusocial species to  
177 come to dominate the ecosystems where they occur, but it may also help explain why some  
178 eusocial species or lineages go extinct over both evolutionary and ecological timescales.

179

## 180 **Results**

181 **Genetic diversity and kinship.** For each of the 12 *Synalpheus* species, we sampled 7-8 breeding  
182 females (i.e., queens) from different sponges (i.e., colonies) from the same reef whenever  
183 possible. Using ddRADseq, we generated >312 million paired-end reads with a median of 2.7  
184 million reads per sample. De novo mapping using *Stacks* generated 19,788 – 52,898 SNPs per  
185 species (median = 24,307, Table S1 and S2; SRA accession: SAMN14351547 -  
186 SAMN14351641). Mean individual observed heterozygosity ( $H_{obs}$ ) based on all sites or just  
187 variant sites did not differ among species exhibiting the three forms of social organization  
188 (pMCMC > 0.19, Fig. S1, Table S3, Table S4): the percentage of heterozygous sites across all  
189 sites ranged from 0.19 to 0.23% across species, which is similar to that observed in non-social  
190 spiders (14) and other non-*Synalpheus* shrimps (53). Moreover, there were low levels of  
191 inbreeding in all species: the inbreeding coefficients (F) were positive and ranged from 0.12 to  
192 0.54 across species (Fig. S1, Table S3). In contrast to the prediction that eusocial species may be  
193 more inbred than non-eusocial species (14), eusocial *Synalpheus* species were significantly more  
194 outbred than communal breeding species (pMCMC = 0.032), but only marginally more outbred  
195 than non-eusocial (pair-living and communal breeding combined) species (pMCMC = 0.062)  
196 (Table S4). Finally, mean average kinship coefficients were negative for all species, meaning  
197 that breeding females across sponges were unrelated to each other (Fig. S1, Table S3). However,  
198 kinship coefficients were significantly higher in eusocial species than in pair-forming species and  
199 non-eusocial species (pMCMC = 0.0003 and 0.02, respectively; Table S4). The relatively higher  
200 degree of genetic relatedness among queens over small spatial scales in eusocial versus non-  
201 eusocial species is consistent with their different modes of larval dispersal: all eusocial species  
202 have crawling larvae that remain in the natal sponge, whereas communal breeding and pair-



203 living species have swimming larvae that disperse from the natal sponge via the water column (7,  
204 45, 54, 55).

205  
206 **Demographic inference and stability.** Rather than simply comparing  $N_e$  values at specific time  
207 points, we examined relative changes in  $N_e$  between species to identify broad demographic  
208 patterns within groups of species exhibiting different forms of social organization. This approach  
209 avoided interpretation of the timing of events and absolute  $N_e$  values, both of which can be  
210 confounded by potential variations in mutation and recombination rates across species (51).  
211 Knowledge of mutation rates and generation times are not well known in *Synalpheus* shrimps  
212 and most other social animals (56), and thus, such an analysis could generate uncertainty in  
213 absolute  $N_e$  estimates. However, in lieu of exact point inferences, the main features of the model  
214 (i.e., relative changes, overall size changes, directionality, and broad patterns in demographic  
215 history) can be accomplished with confidence through bootstrapping simulated data under the  
216 best-model demographic scenario (57). Thus, due to the uncertainty in determining absolute  $N_e$   
217 values, reporting on the broad demographic trends and relative changes in  $N_e$  is the accepted  
218 approach when using coalescent-based modeling to estimate demography from the site frequency  
219 spectrum (35-40, 58-61).

220  
221 After removing related individuals ( $n = 5$  of 96) and drawing one random SNP per locus, we  
222 used 11,890 – 26,148 SNPs per species (median = 18,175, Table S1) for demographic inference  
223 analysis using *MOMI2*, an efficient and scalable demographic inference software that can handle  
224 complex datasets (23, 24). For each species, we ran multiple analyses that varied in the number  
225 of times  $N_e$  was inferred ( $T = 4, 6, \text{ or } 8$  time points) and over different timescales ( $G = 60, 80, \text{ or } 100$   
226 thousand generations). To examine  $N_e$  across species with the same underlying parameters  
227 ( $T$  and  $G$ ), we compared the delta AIC (62) across analyses and found that a model that  
228 estimated  $N_e$  four times across 100,000 generations had the best support across species (Table  
229 S4). Estimated values of  $N_e$  from this model were generally within the 95% confidence interval  
230 of the bootstrap estimates (see Supporting Information: Fig. S2), indicating that the patterns were  
231 consistent across 300 different subsets of SNPs. Assuming several generations per year, a time  
232 scale of roughly 100,000 generations is likely to span most of the Holocene.

233  
234 In general,  $N_e$  values were higher and more variable through time in pair-living and communal  
235 breeding species, whereas they were lower but more stable through time in eusocial species (Fig.  
236 2). There appeared to be a reduction of  $N_e$  at 51-75 thousand generations ago for three out of four  
237 eusocial species. Similarly, three communal species also showed a reduction of  $N_e$  at 26-50  
238 thousand generations ago. These shared trends indicate that these species may respond to the  
239 same demographic event and gave additional confidence to our estimates. However, since our  
240 primary aim was to examine the relative trends of historic  $N_e$  among species exhibiting different  
241 forms of social organization, in addition to estimating the average population size over multiple  
242 timepoints, we also calculated three population stability metrics using inferred historical  $N_e$  from  
243 the best fit model with the highest log-likelihood. We then used phylogenetic mixed models  
244 implemented in *MCMCglmm* (63) to compare these demographic metrics using both a  
245 continuous measure of eusociality (eusociality index) and across discrete social categories (64).  
246 Importantly, the eusociality index captures the reproductive skew within a group (7, 65, 66),  
247 making no *a priori* assumption of social phenotype. Our results confirmed the above patterns  
248 statistically in 3 of 4 metrics of population size and stability: as eusociality index increased

249 (hence stronger reproductive skew), mean  $N_e$  decreased, CV decreased, and min/mean  $N_e$   
250 increased, though no. <1-order change did not change (pMCMC = 0.018, 0.031, 0.025, and 0.63,  
251 respectively, Fig. 3; see Supporting Information Table S5). We observed qualitatively similar  
252 results using discrete social categories, such that eusocial species had significantly lower mean  
253  $N_e$  than non-eusocial species (pMCMC = 0.021), as well as marginally lower CV, higher  
254 min/mean  $N_e$ , and higher no. of <1-order difference in  $N_e$  values than non-eusocial species  
255 (pMCMC = 0.055, 0.058, and 0.076, respectively, Fig. 4; see Supporting Information, Table S5).  
256 Although the limited number of species in each social category likely contributed to the marginal  
257 levels of statistical significance, the results are consistent with those from the analysis using the  
258 eusociality index. Finally, analyses using the median demographic metrics across bootstrap  
259 estimates showed similar trends, but lacked statistical significance (see Supporting Information,  
260 Fig. S3), likely because smaller subsets of SNPs were used in these analyses. Thus, eusocial  
261 shrimp species have lower but more stable  $N_e$  through time than their non-eusocial relatives.  
262

## 263 Discussion

264 Cooperation between individuals of the same species leading to the formation of complex  
265 societies is thought to have enabled eusocial animals to become ecologically dominant in the  
266 areas where they occur, sometimes comprising more than half of the biomass in a given  
267 ecosystem (2). The peculiar demographic consequences of eusociality have been suggested to  
268 both help and hinder their ecological dominance, although empirical tests of these ideas have  
269 largely been lacking. Here, we examined the relationship between demography and eusociality in  
270 a socially diverse clade of *Synalpheus* snapping shrimps using historical demographic inference  
271 to determine whether eusocial species are more or less demographically stable than their non-  
272 eusocial relatives (4). We found that eusocial *Synalpheus* snapping shrimps, across four  
273 independently-evolved eusocial lineages, consistently had lower but more stable  $N_e$  through time  
274 than non-eusocial species. This long-term stability of  $N_e$  in eusocial shrimp species supports the  
275 idea that reproductive division of labor may enable groups to buffer the breeding individuals  
276 (i.e.,  $N_e$ ) against environmental fluctuation or that cooperation may help eusocial species to  
277 better defend and maintain their domiciles. Furthermore, Wilson (4) argued that a critical  
278 criterion for ecological success was population density that could be sustained for long periods of  
279 time. Our results are consistent with this idea, adding to field observations that, for more than  
280 two decades, eusocial *Synalpheus* outcompeted their non-eusocial relatives to become the  
281 ecologically dominant shrimp species on the reef (7, 49). Although species with low mean  $N_e$   
282 may be more susceptible to extinction due to reductions in genetic diversity and high genetic  
283 load (67), this does not seem to be the case in eusocial shrimp because eusocial species exhibited  
284 less evidence of inbreeding than non-eusocial species. Moreover, we found no evidence of  
285 population bottlenecks, cyclical patterns of expansion, or contractions of  $N_e$  in eusocial shrimp  
286 species, as found in other primitively eusocial animals (15). Instead, eusocial shrimp species  
287 appear to be more demographically stable than non-eusocial species, a conclusion that remains  
288 robust whether we consider social organization as a categorical or continuous variable. Our results  
289 agree with recent ecological models showing primitive eusociality to be generally more  
290 successful than solitary nesting in terms of reproduction and extinction probabilities (68). The  
291 evolutionary dead-ends observed in social spiders and other primitively eusocial animals may be  
292 explained by the advantages of solitary nesting compared to eusociality under very restricted  
293 assumptions in simulation studies (68, 69).  
294

295 One of the primary motivations for this study was to quantify the demographic consequences of  
296 eusociality in snapping shrimps in order to understand the mechanism underlying the ecological  
297 dominance of eusocial species on Caribbean reefs. Yet, this study also has more practical  
298 implications since eusocial *Synalpheus* species in Belize, Panama, and Jamaica have either gone  
299 locally extinct or declined significantly in abundance in recent years, while non-eusocial species  
300 have remained stable or increased in abundance over the same timeframe (50). Our findings that  
301 eusocial *Synalpheus* species had stable effective population sizes over evolutionary time, and the  
302 absence of any evidence of population bottlenecks or cyclical patterns of expansion or  
303 contractions of  $N_e$ , together suggest that these recent population declines are unprecedented in  
304 the last 100,000 generations, spanning most of the Holocene. We propose instead that  
305 contemporary population declines may be due to recent environmental changes across the  
306 Caribbean, which likely impact eusocial species more strongly because of their lower average  $N_e$   
307 and limited ability to disperse. For several decades, direct anthropogenic development and  
308 environmental disturbances have negatively impacted coastal and marine ecosystems across the  
309 Caribbean (70). A combination of warming sea surface temperatures (71), rising sea level (72),  
310 and increased hurricane activity have been affecting the Caribbean, all of which negatively  
311 impact benthic communities (73, 74). The global increase in  $CO_2$  has also caused increased  
312 acidification, especially in the Caribbean region over the past 25 years, negatively affecting a  
313 wide range of biological systems (75). Together, these climate events have had devastating  
314 impacts on local ecosystems, including on sponge communities (e.g., 76). Since *Synalpheus* are  
315 obligate sponge dwellers, and many are strict host specialists (6), these symbionts may be  
316 particularly sensitive to environmental change. Within sponges that host *Synalpheus* shrimps,  
317 extreme environmental perturbations are likely driving the global increase in sponge diseases,  
318 which has especially affected Mediterranean and Caribbean sponges (77). Increasingly disturbed  
319 by anthropogenic pressures, the survival of local snapping shrimp populations is likely  
320 dependent on their ability to quickly and efficiently recolonize host sponges. However, the life  
321 history of eusocial shrimp species may hamper their ability to recolonize host sponge after a  
322 local population crash: eusocial shrimps tend to be host specialists (6) and all eusocial species  
323 have crawling larvae that remain in the natal sponge, in contrast to communal breeding and pair-  
324 living species that have swimming larvae that can disperse from the natal sponge in the water  
325 column (7, 54, 55). Our genetic diversity results support this life history difference: eusocial  
326 shrimps have the highest levels of relatedness (Fig. S1) across females from different sponges  
327 within a local population (collection site), a pattern seen previously using allozymes (78).  
328 Therefore, eusocial species appear to have lower migration and colonization rates than non-  
329 eusocial species, hence potentially less gene flow between populations, as shown in an early  
330 population genetics study (78). Thus, although eusocial *Synalpheus* species have been  
331 ecologically dominant in parts of the Caribbean for at least a few decades (7, 49) and  
332 demographically stable for thousands of years, in the face of increased anthropogenic  
333 environmental disturbance, eusocial species may be more susceptible to population collapse and  
334 extinction than their non-eusocial relatives.

335  
336 In conclusion, our analyses are consistent with the idea that eusocial animals tend to be more  
337 demographically stable than their non-eusocial relatives; we found a signature of lower and more  
338 stable  $N_e$  in eusocial shrimps compared to non-eusocial species. In contrast, we found no  
339 evidence of cyclic population contractions or extinctions in eusocial species that would indicate  
340 population instability. Our results suggest that for at least 100,000 generations spanning



341 thousands of years, eusocial shrimp populations in the Caribbean appear to have been more  
342 stable than those of non-eusocial species, suggesting that the recent extirpation of ecologically  
343 dominant eusocial species may be driven by anthropogenic changes in combination with their  
344 lower  $N_e$  and limited dispersal ability. Therefore, the long-term demographic stability in eusocial  
345 snapping shrimp is likely one of the key factors in promoting their ecological dominance on  
346 tropical reefs, an idea that has been proposed but not tested for eusocial insects that have come to  
347 dominate much of the terrestrial world. Yet, the demographic and life history characteristics of  
348 eusocial shrimps also render them vulnerable to recent global change. Ultimately, studying  
349 changes in demography through time will not only help understand the long-term population  
350 dynamics of social organisms, it may also provide critical insights into how social species will  
351 cope in the face of increasing climate change and habitat loss.

352

## 353 **Materials and Methods**

354 **Sampling and study species.** We sampled 12 species of *Synalpheus* snapping shrimps from four  
355 sites in the Caribbean (Belize, Barbados, Jamaica, and Panama) between 2004 and 2012 (Fig. 1).  
356 A detailed collection protocol has been reported previously (49). For each species, we sampled  
357 7-8 females, enough for confident demographic inference (42, 43), with eggs or visible ovarian  
358 development to ensure that we were sampling breeding individuals. We sampled females from  
359 different sponges whenever possible. For eusocial species, each sponge represented a colony.  
360 Thus, sampling from different sponges ensured that we had a more complete representation of  
361 the population at each site. All individuals were collected within a 5-year sampling period  
362 (Supporting Information: Table S1).

363

364 Our sampled species included three pair-forming, five communal breeding, and four eusocial  
365 species. The four eusocial species included one species from each of the lineages that  
366 independently evolved eusociality in the genus *Synalpheus*. Two eusocial species (*S. brooksi* and  
367 *S. chacei*) were from Belize where, before the recent population decline, they dominated their  
368 habitat over non-eusocial species based on abundance, sponge occupancy, and host ranges (7).  
369 Local population declines were observed from field surveys for *S. chacei* from Belize, *S. duffyi*  
370 from Jamaica, and *S. rathbunae* from Panama (50). For a meaningful comparison of historical  
371 demographics, we included non-eusocial species that showed stable or increasing populations  
372 from the same three sites (50).

373

374 **Double digest restriction-site associated DNA sequencing.** We extracted genomic DNA using  
375 several walking legs from alcohol-preserved specimens using Qiagen DNAeasy Tissue Kits.  
376 Extracted DNA was quantified using a Qubit 3.0 Fluorometer with the dsDNA HS assay  
377 (ThermoFisher Scientific) and visualized on 2% agarose gels. We followed the protocol in  
378 Peterson et al. (2012) using the restriction enzymes EcoRI and MspI. We used the recommended  
379 size selection criterion (338bp – 414bp) based on the estimated genome sizes of each species,  
380 which ranged from approximately 6.49 to 20.74 pg (where 1 pg = 978 Mbp) (79). Briefly, we  
381 digested 1,000 ng of genomic DNA with EcoRI and MspI (New England Biolabs) and cleaned  
382 the digested DNA using Agencourt AMPure XP beads (Beckman Coulter Life Sciences). We  
383 ligated the double-digested DNA with barcoded adaptors that were 5-fold in excess to prevent  
384 the formation of chimeras. We pooled and bead-cleaned barcoded samples before size selection  
385 using a Pippin Prep and a dye-free 2% Agarose gel cassette with internal standards (CDF2010,  
386 Sage Science). We performed a 10-cycle PCR using a Phusion PCR Kit according to the

387 manufacturer's protocol (New England Biolabs) with multiplexed primers and adjusted PCR  
388 products to 10  $\mu$ M for sequencing on either an Illumina HiSeq2500 (125 bp paired-end, New  
389 York Genome Center) or an Illumina HiSeq 3000 (150 bp paired-end, Center for Genome  
390 Research and Biocomputing at Oregon State University).

391  
392 We used *Stacks* v2.1 (80) to demultiplex and clean raw reads (*process\_radtags: reads with phred*  
393 *score <10 were discarded*) and perform *de novo* mapping of paired-end reads (*denovo\_map.pl*  
394 with the parameters T = 6, m = 3, M = 3, and n = 2). We adjusted the parameter *r* (0.5 – 0.875) in  
395 *populations* in the *Stacks* pipeline to obtain around 20,000 SNPs per species (19,778 – 52,898).

396  
397 **Genetic diversity and kinship.** We calculated several statistics to summarize the genetic  
398 diversity at the individual level, and to quantify the levels of inbreeding and kinship among  
399 females, each from different sponges within the same collection site. First, we estimated  
400 observed heterozygosity ( $H_{obs}$ ) for each sample from *populations* in the *Stacks* pipeline, which is  
401 essentially the number of heterozygous sites divided by the total number of fixed and variant  
402 sites for each sample, and took the mean  $H_{obs}$  for each species. We also calculated  $H_{obs}$  based on  
403 variant sites only. We calculated the averaged inbreeding coefficient (F) across individuals for  
404 each species using *VCFtools* v0.1.16 (81). F measures the probability that two alleles at a given  
405 locus are identical by descent. An individual is fully inbred when F = 1 and fully outbred when F  
406 = 0 (82). Finally, we used *King* v2.1.6 (83) to calculate the genome-wide relatedness between  
407 each female within a species. We took the mean kinship coefficient between pairs of individuals  
408 (one female per sponge) for each species. For each genetic statistic (mean  $H_{obs}$ , F, and mean  
409 kinship coefficient), we performed phylogenetic mixed model regressions using the R package  
410 *MCMCglmm* v2.29 (63) to test whether they differed according to the form of social organization  
411 (pair-forming vs. communal breeding vs. eusocial) or eusociality (eusocial vs. non-eusocial),  
412 while controlling for phylogenetic non-independence between species. We used a Bayesian  
413 consensus tree of *Synalpheus* species, constructed with 16S, 18S, and COI sequence data (64).  
414 We used weakly informative priors (variance parameters, V = 1, degree of belief, nu = 0.002),  
415 but more or less informative priors yielded the same results (nu = 0.02 or 0.0002). We  
416 ran 2,000,000 Markov Chain Monte Carlo (MCMC) iterations with 50,000 iterations of burn-in  
417 and a thinning interval of 250. Pairwise differences between categories of sociality or eusociality  
418 were tested by comparing the difference in posterior distributions of each category (e.g., eusocial  
419 – communal breeding) and calculating a pMCMC value as twice the probability that the posterior  
420 distribution of the difference is above or below zero (63).

421  
422 **Demographic inference.** For pairs of individuals that were closer than 3<sup>rd</sup>-degree-related (>  
423 25%, based on kinship coefficients > 0.089), we randomly removed one individual using  
424 *VCFtools* v0.1.16 (81). We removed two individuals from *S. rathbunae* and one individual each  
425 from *S. agelas*, *S. carpenteri*, and *S. chacei*. We then extracted one random SNP per locus using  
426 the script *vcfparser.py* (84) to generate a vcf file for demographic inference analysis using  
427 *MOMI2* v2.1.16 (23, 24). For comparative purposes, we chose to infer  $N_e$  from T fixed time  
428 ranges across G generations for all species. Initial  $N_e$  was set at 1e+6 and maximum  $N_e$  at 1e+21  
429 for all species. The value of initial  $N_e$  was based on the mean  $N_e$  across species from single  $N_e$   
430 models (See Supporting Information). The value of maximum  $N_e$  was based on running multiple  
431 models with different parameter values and finding the value that yielded the highest log-  
432 likelihood across species (See Supporting Information). We ran 300 random starts to find the

433 model with the highest log-likelihood. We further ran 300 bootstraps, each with 50 random starts  
434 to find the model with the highest log-likelihood support. Preliminary analyses showed that  
435 estimating  $N_e$  at fixed time ranges (e.g., 1-20, 21-40, 41-60, and 61-80 thousand generations)  
436 gave better model support than estimating  $N_e$  at fixed times (e.g., 20, 40, 60, and 80 thousand  
437 generations) (see Supporting Information: Fig. S4).

438  
439 To find the best specification of model parameters T (number of time ranges) and G (maximum  
440 number of generations), we ran seven models that differed in T (4, 6, and 8) and G (60, 80, and  
441 100 thousand). We did not estimate  $N_e$  changes that were less than 10,000 generations apart  
442 because our preliminary analysis showed that the order of magnitude that we can estimate  
443 change among the 12 species was about 10,000 generations (See Supporting Information). For  
444 each species, we compared the support for each parameter set using delta AIC (62). The model  
445 with delta AIC = 0 had the best support and models with delta AIC < 3 were considered to be  
446 equally-supported best models. We chose the model with the parameter set that was most  
447 frequently supported across species under the criteria of delta AIC < 3 (Table S5).

448  
449 **Phylogenetic comparative analysis.** From the best fit model with the highest log-likelihood, we  
450 used the  $N_e$  values estimated across 10,000 – 100,000 generations for each species. We  
451 calculated mean  $N_e$  across time (mean  $N_e$ ), as well as three population stability metrics for  
452 comparative analyses: (i) the coefficient of variation of  $N_e$  based on the log-normal distribution  
453 (CV); (ii) the ratio of minimum  $N_e$  to mean  $N_e$  (min/mean  $N_e$ ); and (iii) the number of times  
454 where two consecutive  $N_e$  estimates had less than one order of magnitude difference (no. of <1-  
455 order change). We did not include the  $N_e$  estimate at time 0 (i.e. the most recent  $N_e$ ) in our  
456 analysis because this estimate was strongly correlated with the initial  $N_e$  that we specified in  
457 *MOMI2* (data not shown). Further, demographic inference based on ddRAD may not reflect  
458 recent population changes (31) unless sample size per population was very large (> 30) (42, 85).  
459 We used the Shapiro-Wilk's test to check for normality, ultimately log-transforming mean  $N_e$ ,  
460 CV, and min/mean  $N_e$ .

461  
462 We performed phylogenetic mixed model regressions using *MCMCglmm* (63) as described  
463 above. Briefly, we tested whether the four metrics of population size and stability differed  
464 according to the form of social organization (pair-forming vs. communal breeding vs. eusocial)  
465 or eusociality (eusocial vs. non-eusocial), while controlling for phylogenetic non-independence  
466 between species and treating collection site as a random factor. We performed the same analyses  
467 using the demographic metrics calculated from the median of 300 bootstraps  $N_e$  estimates. We  
468 also performed a similar analysis using the eusociality index ( $E = 1 - ((2 \times \text{NOF}) / \text{CS})$ ) where  
469 CS, colony size, is the total number of individuals in a sponge and NOF is the number of  
470 ovigerous females in a sponge based on data from (64), which captures the degree of  
471 reproductive skew within a group and has been used to measure the level of eusociality in  
472 *Synalpheus* and other invertebrates (7, 65).

473  
474 **Acknowledgements.** S.T.C.C. was supported by the Simons Foundation via the Life Sciences  
475 Research Foundation. S.E.H. was supported by the Frontiers of Science Fellowship at Columbia  
476 University. D.R.R. was supported by the US National Science Foundation (IOS-1121435, IOS-  
477 1257530, IOS-1439985). This work made use of the high performance computing resources from  
478 Columbia University.

479

480 **Author Contributions.** D.R.R and S.E.H. designed the study. S.T.C.C. and S.E.H. performed  
481 the experiment, conducted analyses, and drafted the manuscript. All authors collected specimens  
482 and revised the manuscript.

483

484 The authors declare no conflict of interest.

485

486 **Data Availability.** Supporting data is available from the Supporting Information. Sequence  
487 reads were deposited in NCBI's Sequence Read Archive (Accession numbers: SAMN14351547  
488 - SAMN14351641). Additional data is available in Dryad.

489

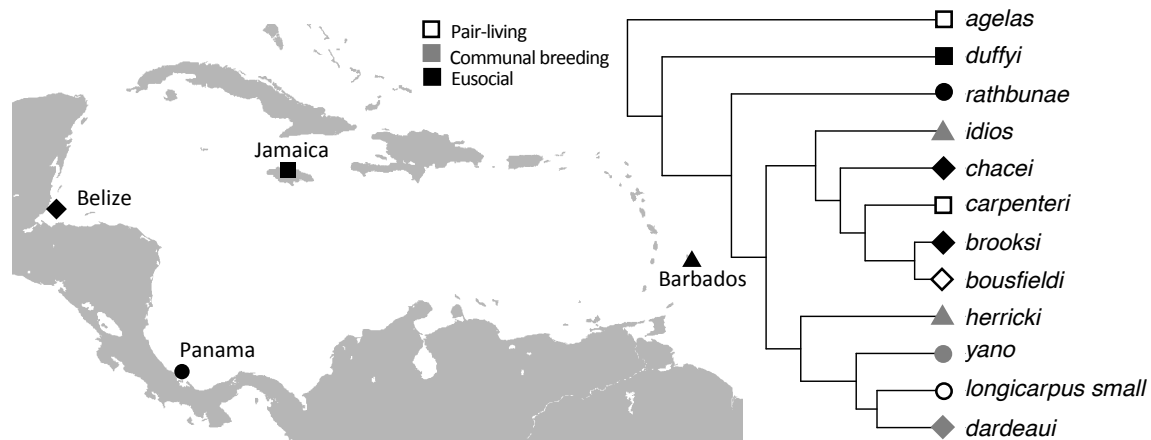

490  
491  
492  
493  
494  
495  
496

**Fig. 1.** Collection sites and evolutionary relationships among 12 sponge-dwelling snapping shrimps in the genus *Synalpheus* used for comparative demographic inference. Each shape corresponds to a different sampling locality. The color of each shape corresponds to the form of social organization (white: pair-living, grey: communal breeding, and black: eusocial). The map is modified from Wikimedia Commons under CC BY-SA 3.0.



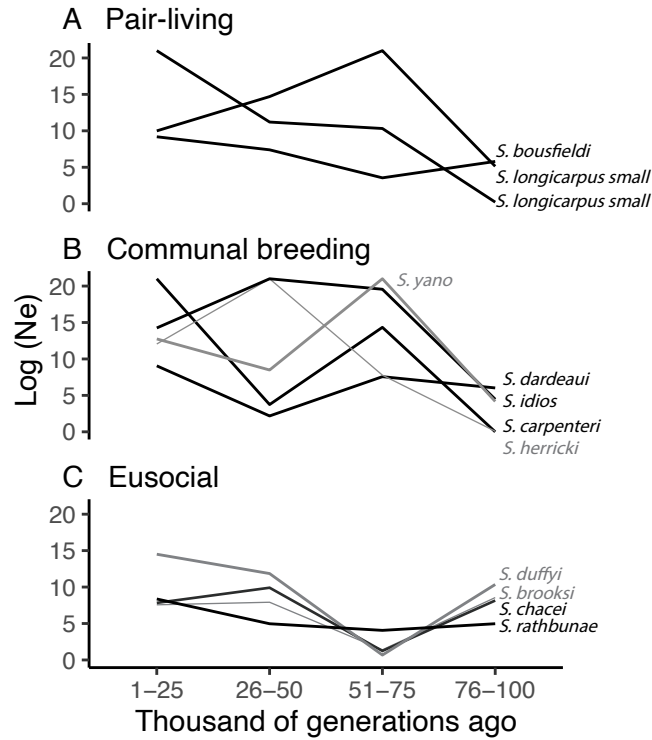

497  
498  
499  
500  
501  
502  
503

**Fig. 2.** Best model estimates of  $N_e$  across 100,000 generations in 12 *Synalpheus* species exhibiting different forms of social organization (A: pair-living, B: communal breeding, C: eusocial). Each line represents  $N_e$  for a species, with species label on the right. Some lines were shown as grey or thin grey lines for clarity. Bootstrap estimates are shown in Fig S2.

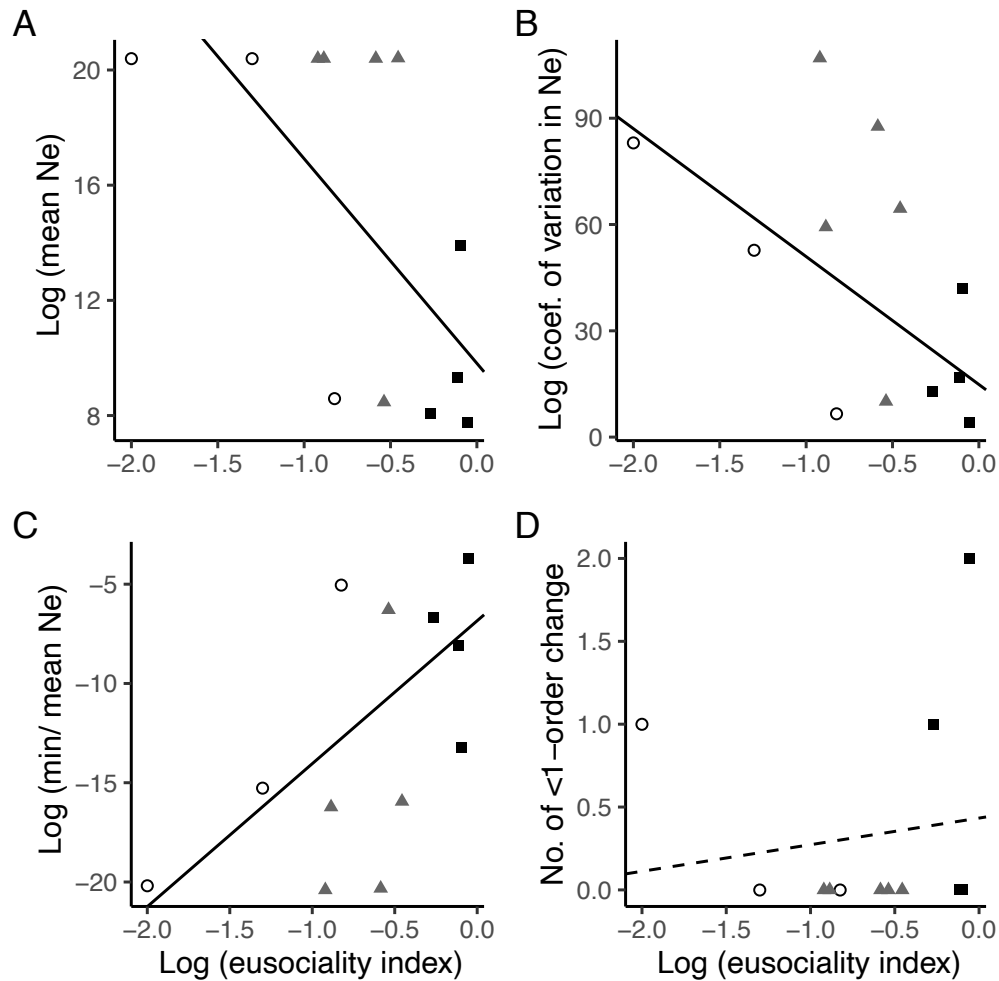

504  
505

506 **Fig. 3.** Relationships between the eusociality index and metrics of population size and stability in  
507 12 *Synalpheus* species: (A) mean  $N_e$  across time, (B) coefficient of variation in  $N_e$ , (C) min/mean  
508  $N_e$  and (D) No. of <1-order change in  $N_e$ . Symbols represent raw values: open circles = pair-  
509 forming species, grey triangles = communal breeding species, dark squares = eusocial species.  
510 Solid and dashed lines represent significant and non-significant regression slopes predicted using  
511 Bayesian phylogenetic mixed models, respectively.

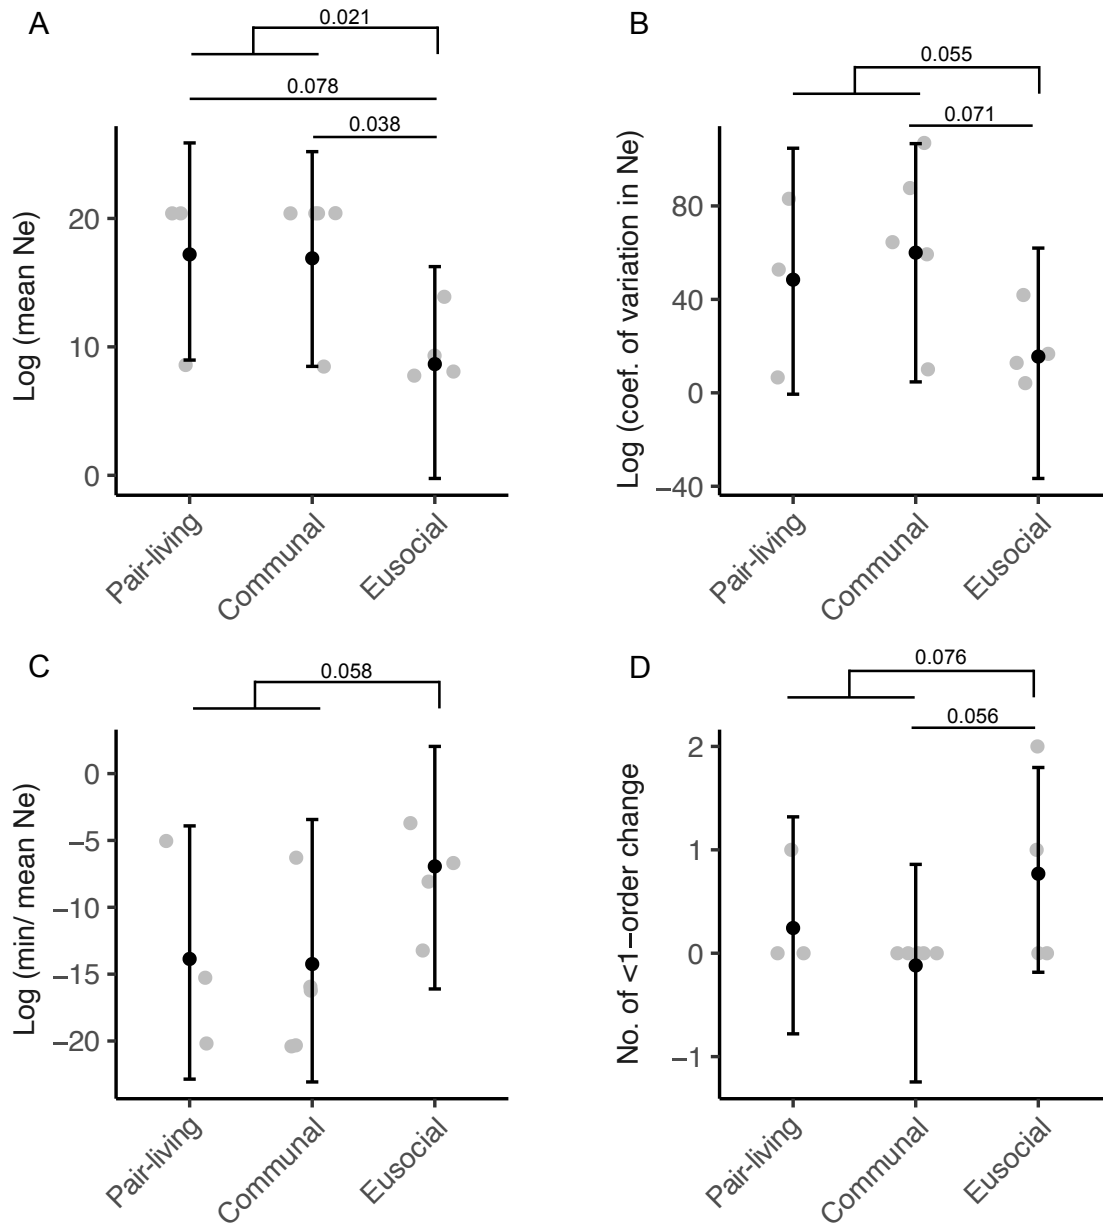

512  
513

514 **Fig. 4.** Metrics of population size and stability across 12 *Synalpheus* shrimps exhibiting different  
515 forms of social organization. Eusocial species have lower mean  $N_e$  across time (A), but more  
516 stable values of  $N_e$  across generation time as indicated by lower CV (B), higher min/mean  $N_e$   
517 (C), and higher no. <1-order change (D). Grey dots are raw values, black dots are posterior mean  
518 predicted using Bayesian phylogenetic mixed model, bars are the 95% posterior distributions,  
519 and pMCMC values are twice the probability that the posterior distribution of the difference is  
520 above or below zero.

521

522 **REFERENCES**

523

- 524 1. E. O. Wilson, *The insect societies* (Belknap Press of Harvard University Press,  
525 Cambridge. Massachusetts, 1971).
- 526 2. E. O. Wilson, *The social conquest of earth* (Liveright Publishing, New York, NY, 2012).
- 527 3. S.-J. Sun *et al.*, Climate-mediated cooperation promotes niche expansion in burying  
528 beetles. *eLife* **3**, e02440 (2014).
- 529 4. E. O. Wilson, Causes of ecological success: the case of the ants. *The Journal of Animal*  
530 *Ecology* **56**, 1-9 (1987).
- 531 5. B. Holldobler, E. O. Wilson, *The ants* (Harvard Univ. Press, Cambridge, MA, 1990),  
532 10.1007/978-3-662-10306-7.
- 533 6. K. C. Brooks, R. Maia, J. E. Duffy, K. M. Hultgren, D. R. Rubenstein, Ecological  
534 generalism facilitates the evolution of sociality in snapping shrimps. *Ecol. Lett.* **12**, 1516-  
535 1525 (2017).
- 536 7. J. E. Duffy, K. S. Macdonald, Kin structure, ecology and the evolution of social  
537 organization in shrimp: a comparative analysis. *Proc Biol Sci* **277**, 575-584 (2010).
- 538 8. Y.-H. Lin, S.-F. Chan, D. R. Rubenstein, M. Liu, S.-F. Shen, Resolving the paradox of  
539 environmental quality and sociality: The ecological causes and consequences of  
540 cooperative breeding in two lineages of birds. *The American Naturalist* **194**, 207-216  
541 (2019).
- 542 9. J. Romiguier *et al.*, Population genomics of eusocial insects: the costs of a vertebrate-like  
543 effective population size. *J. Evol. Biol.* **27**, 593-603 (2014).
- 544 10. M. Hasselmann, L. Ferretti, A. Zayed, Beyond fruit-flies: population genomic advances  
545 in non-*Drosophila* arthropods. **14**, 424-431 (2015).
- 546 11. E. O. Wilson, Social modifications related to rareness in ant species. *Evolution* **17**, 249-  
547 253 (1963).
- 548 12. R. Crozier, Genetics of sociality. *Social insects* **1**, 223-286 (1979).
- 549 13. I. Agnarsson, L. Avilés, J. A. Coddington, W. P. Maddison, D. Funk, Sociality in  
550 Theridiid spiders: repeated origins of an evolutionary dead end. *Evolution* **60**, 2342-2351  
551 (2006).
- 552 14. V. Settepani *et al.*, Evolution of sociality in spiders leads to depleted genomic diversity at  
553 both population and species levels. *Mol. Ecol.* **26**, 4197-4210 (2017).
- 554 15. L. Aviles, J. Purcell, The evolution of inbred social systems in spiders and other  
555 organisms: From short-term gains to long-term evolutionary dead ends? *Advances in the*  
556 *Study of Behavior* **44**, 99-143 (2012).
- 557 16. L. F. Keller, D. M. Waller, Inbreeding effects in wild populations. *Trends Ecol. Evol.* **17**,  
558 230-241 (2002).
- 559 17. C. D. Bustamante, J. Wakeley, S. Sawyer, D. L. Hartl, Directional Selection and the Site-  
560 Frequency Spectrum. *Genetics* **159**, 1779-1788 (2001).
- 561 18. R. Nielsen, Molecular signatures of natural selection. *Annu. Rev. Genet.* **39**, 197-218  
562 (2005).
- 563 19. J. M. Braverman, R. R. Hudson, N. L. Kaplan, C. H. Langley, W. Stephan, The  
564 Hitchhiking Effect on the Site Frequency Spectrum of DNA Polymorphisms. *Genetics*  
565 **140**, 783-796 (1995).

- 566 20. A. T. Xue, M. J. Hickerson, multi-dice: r package for comparative population genomic  
567 inference under hierarchical co-demographic models of independent single-population  
568 size changes. *Mol Ecol Resour* **17**, e212-e224 (2017).
- 569 21. R. N. Gutenkunst, R. D. Hernandez, S. H. Williamson, C. D. Bustamante, Inferring the  
570 joint demographic history of multiple populations from multidimensional SNP frequency  
571 data. *PLoS Genet.* **5**, e1000695 (2009).
- 572 22. S. Lukic, J. Hey, Demographic inference using spectral methods on SNP data, with an  
573 analysis of the human out-of-Africa expansion. *Genetics* **192**, 619-639 (2012).
- 574 23. J. A. Kamm, J. Terhorst, Y. S. Song, Efficient computation of the joint sample frequency  
575 spectra for multiple populations. *J Comput Graph Stat* **26**, 182-194 (2017).
- 576 24. J. Kamm, J. Terhorst, R. Durbin, Y. S. Song, Efficiently Inferring the Demographic  
577 History of Many Populations With Allele Count Data. *Journal of the American Statistical*  
578 *Association* 10.1080/01621459.2019.1635482, 1-16 (2019).
- 579 25. S. E. Harris *et al.*, Urbanization shapes the demographic history of a native rodent (the  
580 white-footed mouse, *Peromyscus leucopus*) in New York City. *Biol. Lett.* **12** (2016).
- 581 26. L. Excoffier, I. Dupanloup, E. Huerta-Sanchez, V. C. Sousa, M. Foll, Robust  
582 demographic inference from genomic and SNP data. *PLoS Genet.* **9**, e1003905 (2013).
- 583 27. M. Rincon-Sandoval, R. R. Betancur, J. A. Maldonado-Ocampo, Comparative  
584 phylogeography of trans-Andean freshwater fishes based on genome-wide nuclear and  
585 mitochondrial markers. *Mol. Ecol.* **28**, 1096-1115 (2019).
- 586 28. J. V. Penalba, L. Joseph, C. Moritz, Current geography masks dynamic history of gene  
587 flow during speciation in northern Australian birds. *Mol. Ecol.* **28**, 630-643 (2019).
- 588 29. C. D. Barratt *et al.*, Vanishing refuge? Testing the forest refuge hypothesis in coastal East  
589 Africa using genome-wide sequence data for seven amphibians. *Mol. Ecol.* **27**, 4289-  
590 4308 (2018).
- 591 30. S. Potter *et al.*, Pleistocene climatic changes drive diversification across a tropical  
592 savanna. *Mol. Ecol.* **27**, 520-532 (2018).
- 593 31. J. D. Lozier, Revisiting comparisons of genetic diversity in stable and declining species:  
594 assessing genome-wide polymorphism in North American bumble bees using RAD  
595 sequencing. *Mol. Ecol.* **23**, 788-801 (2014).
- 596 32. L. D. Bertola *et al.*, Asymmetrical gene flow in five co-distributed syngnathids explained  
597 by ocean currents and rafting propensity. *Proc. R. Soc. B* **287**, 20200657 (2020).
- 598 33. A. Fages *et al.*, Tracking five millennia of horse management with extensive ancient  
599 genome time series. *Cell* **177**, 1419-1435.e1431 (2019).
- 600 34. S. D. Bolívar-Leguizamón, L. F. Silveira, E. P. Derryberry, R. T. Brumfield, G. A.  
601 Bravo, Phylogeography of the Variable Antshrike (*Thamnophilus caerulescens*), a South  
602 American passerine distributed along multiple environmental gradients. *Mol. Phylogen.*  
603 *Evol.* **148**, 106810 (2020).
- 604 35. J. A. Baeza, R. Umaña-Castro, L. M. Mejia-Ortiz, Historical demography of the  
605 Caribbean spiny lobster *Panulirus argus* (Latreille, 1804) (Decapoda: Achelata:  
606 Palinuridae) in the Florida Keys, USA inferred using single nucleotide polymorphisms  
607 (SNPs). *J. Crust. Biol.* **39**, 378-385 (2019).
- 608 36. M. Lynch *et al.*, Population genomics of *Daphnia pulex*. *Genetics* **206**, 315-332 (2017).
- 609 37. C. Burgarella *et al.*, Molecular Evolution of Freshwater Snails with Contrasting Mating  
610 Systems. *Mol. Biol. Evol.* **32**, 2403-2416 (2015).



- 611 38. D. L. J. Vendrami *et al.*, RAD sequencing sheds new light on the genetic structure and  
612 local adaptation of European scallops and resolves their demographic histories. *Sci Rep* **9**,  
613 7455 (2019).
- 614 39. B. M. Titus, P. D. Blischak, M. Daly, Genomic signatures of sympatric speciation with  
615 historical and contemporary gene flow in a tropical anthozoan (Hexacorallia: Actiniaria).  
616 *Mol. Ecol.* **28**, 3572-3586 (2019).
- 617 40. S. Hotaling *et al.*, Long-distance dispersal, ice sheet dynamics and mountaintop isolation  
618 underlie the genetic structure of glacier ice worms. *Proc Biol Sci* **286**, 20190983 (2019).
- 619 41. J. E. Crawford *et al.*, Population genomics reveals that an anthropophilic population of  
620 *Aedes aegypti* mosquitoes in West Africa recently gave rise to American and Asian  
621 populations of this major disease vector. *BMC Biology* **15** (2017).
- 622 42. S. O. Nunziata, D. W. Weisrock, Estimation of contemporary effective population size  
623 and population declines using RAD sequence data. *Heredity (Edinb)* **120**, 196-207  
624 (2018).
- 625 43. J. D. Robinson, A. J. Coffman, M. J. Hickerson, R. N. Gutenkunst, Sampling strategies  
626 for frequency spectrum-based population genomic inference. *BMC Evol. Biol.* **14**, 1-16  
627 (2014).
- 628 44. C. L. Morrison, R. Ríos, J. E. Duffy, Phylogenetic evidence for an ancient rapid radiation  
629 of Caribbean sponge-dwelling snapping shrimps (*Synalpheus*). *Mol Phylogenet Evol* **30**,  
630 563-581 (2004).
- 631 45. K. M. Hultgren, J. E. Duffy, D. R. Rubenstein, "Sociality in shrimps" in Comparative  
632 Social Evolution, D. R. Rubenstein, P. Abbot, Eds. (Cambridge University Press,  
633 Cambridge, 2017), 10.1017/9781107338319.009, pp. 224-249.
- 634 46. S. T. C. Chak, D. R. Rubenstein, J. E. Duffy, Social control of reproduction and breeding  
635 monopolization in the eusocial snapping shrimp *Synalpheus elizabethae*. *The American*  
636 *Naturalist* **186**, 660-668 (2015).
- 637 47. S. T. C. Chak, J. E. Duffy, D. R. Rubenstein, Reproductive skew drives patterns of sexual  
638 dimorphism in sponge-dwelling snapping shrimps. *Proc. R. Soc. B* **282**, 20150342  
639 (2015).
- 640 48. S. T. C. Chak, J. E. Duffy, "Crustacean social evolution" in Reference Module in Life  
641 Sciences. (Elsevier, 2017), <https://doi.org/10.1016/B978-0-12-809633-8.01028-1>.
- 642 49. K. S. Macdonald, R. Ríos, J. E. Duffy, Biodiversity, host specificity, and dominance by  
643 eusocial species among sponge-dwelling alpheid shrimp on the Belize Barrier Reef.  
644 *Divers. Distrib.* **12**, 165-178 (2006).
- 645 50. J. E. Duffy, K. S. Macdonald III, K. M. Hultgren, S. T. C. Chak, D. R. Rubenstein,  
646 Decline and local extinction of Caribbean eusocial shrimp. *PLoS ONE* **8**, e54637 (2013).
- 647 51. J. G. Schraiber, J. M. Akey, Methods and models for unravelling human evolutionary  
648 history. *Nature Reviews Genetics* **16**, 727-740 (2015).
- 649 52. D. R. Rubenstein *et al.*, Coevolution of genome architecture and social behavior. *Trends*  
650 *Ecol. Evol.* 10.1016/j.tree.2019.04.011 (2019).
- 651 53. J. Yuan *et al.*, Genomic resources and comparative analyses of two economical penaeid  
652 shrimp species, *Marsupenaeus japonicus* and *Penaeus monodon*. *Marine Genomics* **39**,  
653 22-25 (2018).
- 654 54. S. Dobkin, The first post-embryonic stage of *Synalpheus brooksi* Coutière. *Bull. Mar. Sci.*  
655 **15**, 450-462 (1965).

- 656 55. S. Dobkin, *Abbreviated larval development in caridean shrimps and its significance in*  
657 *the artificial culture of these animals* (FAO, 1967).
- 658 56. L. Bromham, R. Leys, Sociality and the rate of molecular evolution. *Mol. Biol. Evol.* **22**,  
659 1393-1402 (2005).
- 660 57. L. M. Gattepaille, M. Jakobsson, M. G. Blum, Inferring population size changes with  
661 sequence and SNP data: lessons from human bottlenecks. *Heredity (Edinb)* **110**, 409-419  
662 (2013).
- 663 58. L. D. Bertola *et al.*, Asymmetrical gene flow in five co-distributed syngnathids explained  
664 by ocean currents and rafting propensity. *Proc Biol Sci* **287**, 20200657 (2020).
- 665 59. A. Fages *et al.*, Tracking Five Millennia of Horse Management with Extensive Ancient  
666 Genome Time Series. *Cell* **177**, 1419-1435 e1431 (2019).
- 667 60. S. D. Bolivar-Leguizamon, L. F. Silveira, E. P. Derryberry, R. T. Brumfield, G. A.  
668 Bravo, Phylogeography of the Variable Antshrike (*Thamnophilus caerulescens*), a South  
669 American passerine distributed along multiple environmental gradients. *Mol Phylogenet*  
670 *Evol* **148**, 106810 (2020).
- 671 61. J. E. Crawford *et al.*, Population genomics reveals that an anthropophilic population of  
672 *Aedes aegypti* mosquitoes in West Africa recently gave rise to American and Asian  
673 populations of this major disease vector. *BMC Biol.* **15**, 16 (2017).
- 674 62. H. Akaike, "Information Theory and an Extension of the Maximum Likelihood Principle"  
675 in Selected Papers of Hirotugu Akaike, E. Parzen, K. Tanabe, G. Kitagawa, Eds.  
676 (Springer New York, 1998), 10.1007/978-1-4612-1694-0\_15 chap. 15, pp. 199-213.
- 677 63. J. D. Hadfield, MCMC methods for multi-response generalized linear mixed models: the  
678 MCMCglmm R package. *Journal of Statistical Software* **33**, 1-22 (2010).
- 679 64. S. T. C. Chak, J. E. Duffy, K. M. Hultgren, D. R. Rubenstein, Evolutionary transitions  
680 towards eusociality in snapping shrimps. *Nature Ecology & Evolution* **1**, 0096 (2017).
- 681 65. L. Keller, N. Perrin, Quantifying the level of eusociality. *Proceedings of the Royal*  
682 *Society B-Biological Sciences* **260**, 311-315 (1995).
- 683 66. P. W. Sherman, E. A. Lacey, H. K. Reeve, L. Keller, The eusociality continuum. *Behav.*  
684 *Ecol.* **6**, 102-108 (1995).
- 685 67. D. Newman, D. Pilson, Increased probability of extinction due to decreased genetic  
686 effective population size: experimental populations of *Clarkia pulchella*. *Evolution* **51**,  
687 354-362 (1997).
- 688 68. J. Field, H. Toyozumi, The evolution of eusociality: no risk-return tradeoff but the  
689 ecology matters. *Ecol. Lett.* **23**, 518-526 (2020).
- 690 69. F. Fu, S. D. Kocher, M. A. Nowak, The risk-return trade-off between solitary and  
691 eusocial reproduction. *Ecol. Lett.* **18**, 74-84 (2015).
- 692 70. R. Rioja-Nieto, L. Álvarez-Filip, Coral reef systems of the Mexican Caribbean: Status,  
693 recent trends and conservation. *Mar. Pollut. Bull.* **140**, 616-625 (2019).
- 694 71. I. Chollett, F. E. Müller-Karger, S. F. Heron, W. Skirving, P. J. Mumby, Seasonal and  
695 spatial heterogeneity of recent sea surface temperature trends in the Caribbean Sea and  
696 southeast Gulf of Mexico. *Mar. Pollut. Bull.* **64**, 956-965 (2012).
- 697 72. H. Palanisamy, M. Becker, B. Meyssignac, O. Henry, A. Cazenave, Regional sea level  
698 change and variability in the Caribbean Sea since 1950. *Journal of Geodetic Science* **2**,  
699 125-133 (2012).
- 700 73. S. B. Goldenberg, C. W. Landsea, A. M. Mestas-Nuñez, W. M. Gray, The recent increase  
701 in Atlantic hurricane activity: Causes and implications. *Science* **293**, 474-479 (2001).

- 702 74. P. J. Klotzbach, The influence of El Niño–Southern Oscillation and the Atlantic  
703 Multidecadal Oscillation on Caribbean tropical cyclone activity. *J. Clim.* **24**, 721-731  
704 (2011).
- 705 75. D. K. Gledhill, R. Wanninkhof, F. J. Millero, M. Eakin, Ocean acidification of the  
706 Greater Caribbean Region 1996–2006. *Journal of Geophysical Research: Oceans* **113**  
707 (2008).
- 708 76. T. B. Smith *et al.*, Caribbean mesophotic coral ecosystems are unlikely climate change  
709 refugia. *Global Change Biol.* **22**, 2756-2765 (2016).
- 710 77. H. M. Luter, N. S. Webster, "Sponge disease and climate change" in Climate Change,  
711 Ocean Acidification and Sponges: Impacts Across Multiple Levels of Organization, J. L.  
712 Carballo, J. J. Bell, J. V. Pildervasser, Eds. (Springer, Switzerland, 2017), pp. 411-428.
- 713 78. J. E. Duffy, Genetic population structure in two tropical sponge-dwelling shrimps that  
714 differ in dispersal potential. *Mar. Biol.* **116**, 459-470 (1993).
- 715 79. N. W. Jeffery, K. Hultgren, S. T. Chak, T. R. Gregory, D. R. Rubenstein, Patterns of  
716 genome size variation in snapping shrimp. *Genome* **59**, 393-402 (2016).
- 717 80. N. C. Rochette, A. G. Rivera-Colón, J. M. Catchen, Stacks 2: Analytical methods for  
718 paired-end sequencing improve RADseq-based population genomics. *bioRxiv*  
719 10.1101/615385, 615385 (2019).
- 720 81. P. Danecek *et al.*, The variant call format and VCFtools. *Bioinformatics* **27**, 2156-2158  
721 (2011).
- 722 82. S. Wright, Coefficients of Inbreeding and Relationship. *The American Naturalist* **56**, 330-  
723 338 (1922).
- 724 83. A. Manichaikul *et al.*, Robust relationship inference in genome-wide association studies.  
725 *Bioinformatics* **26**, 2867-2873 (2010).
- 726 84. D. N. Silva, V. Várzea, O. S. Paulo, D. Batista, Population genomic footprints of host  
727 adaptation, introgression and recombination in coffee leaf rust. *Mol. Plant Pathol.* **19**,  
728 1742-1753 (2018).
- 729 85. F. Marandel *et al.*, Estimating effective population size using RADseq: Effects of SNP  
730 selection and sample size. *Ecol Evol* **10**, 1929-1937 (2020).  
731  
732
